# Supplementary material
Source: PubMed Central journal article supplement (PMC4684796)
Supplement: NIHMS727554-supplement-2.pdf [file NIHMS727554-supplement-2.pdf]

**Supplementary Table 1. Ovarian cancer patient characteristics**

|                               |                                  | <b>OS</b>         |          |                       | <b>DFS</b> |          |                       |
|-------------------------------|----------------------------------|-------------------|----------|-----------------------|------------|----------|-----------------------|
|                               |                                  | <b>N</b>          | <b>P</b> | <b>HR<br/>(95%CI)</b> | <b>N</b>   | <b>P</b> | <b>HR<br/>(95%CI)</b> |
| <b>Age<br/>mean (min-max)</b> |                                  | 135<br>56 (22-84) | 0.01     | 1.03<br>1.01-1.05     |            | 0.0024   | 1.03<br>1.01-1.05     |
| <b>Stage</b>                  | I, II<br>III, IV                 | 32<br>103         | <0.0001  | 11.82<br>3.68-37.9    |            | <0.0001  | 10.28<br>3.68-28.74   |
| <b>Debulking</b>              | Optimal<br>Suboptimal            | 82<br>52          | 0.001    | 0.45<br>0.28-0.72     |            | 0.0002   | 0.41<br>0.26-0.66     |
| <b>Grade</b>                  | < 2<br>≥ 2                       | 28<br>106         | 0.002    | 2.95<br>1.48-5.86     |            | 0.0001   | 3.98<br>1.95-8.14     |
| <b>Histology*</b>             | Serous<br>Endometrioid<br>Others | 97<br>14<br>20    | 0.13     | 0.50<br>0.20-1.25     |            | NS       | 0.59<br>0.26-1.38     |
| <b>CD8</b>                    | High<br>Low                      | 67<br>68          | 0.2085   | 0.73<br>0.45-1.19     |            | NS       | 0.83<br>0.53-1.30     |
| <b>CD8+EZH2+</b>              | High<br>Low                      | 64<br>71          | 0.0027   | 0.46<br>0.28-0.77     |            | 0.008    | 0.53<br>0.33-0.85     |
| <b>EZH2+<br/>(% in CD8+)</b>  | High<br>Low                      | 66<br>67          | <0.0001  | 0.30<br>0.18-0.50     |            | 0.0045   | 0.51<br>0.32-0.81     |

Note: Optimal debulking is defined as residual implants ≤ 1 cm. DFI, disease-free interval;

\* endometrioid vs serous+others; NS: P > 0.1

**Supplementary Table 2. Multivariate survival analysis**

|                   | <b>P</b> | <b>HR (95%CI)</b>     |
|-------------------|----------|-----------------------|
| <b>Age</b>        | 0.029    | 1.026 (1.003, 1.050)  |
| <b>FIGO Stage</b> | 0.001    | 7.311 (2.167, 24.658) |
| <b>Grade</b>      | NS       | 1.609 (0.755, 3.430)  |
| <b>Histology*</b> | NS       | 0.953 (0.354, 2.564)  |
| <b>Debulking</b>  | NS       | 0.780 (0.463, 1.314)  |
| <b>CD8</b>        | 0.085    | 0.621 (0.361, 1.068)  |

\* endometrioid vs others; NS: P > 0.1

**Supplementary Table 3. Multivariate survival analysis**

|                   | <b>P</b> | <b>HR (95%CI)</b>     |
|-------------------|----------|-----------------------|
| <b>Age</b>        | 0.043    | 1.024 (1.001, 1.047)  |
| <b>FIGO Stage</b> | 0.002    | 7.130 (2.120, 23.975) |
| <b>Grade</b>      | NS       | 1.400 (0.664, 2.952)  |
| <b>Histology*</b> | NS       | 0.860 (0.320, 2.309)  |
| <b>Debulking</b>  | NS       | 0.779 (0.462, 1.312)  |
| <b>CD8+EZH2*</b>  | 0.036    | 0.554 (0.319, 0.963)  |

\* endometrioid vs others; NS: P > 0.1

**Supplementary Table 4. Multivariate survival analysis**

|                              | <b>P</b> | <b>HR (95%CI)</b>     |
|------------------------------|----------|-----------------------|
| <b>Age</b>                   | NS       | 1.013 (0.990, 1.036)  |
| <b>FIGO Stage</b>            | 0.002    | 7.345 (2.123, 25.406) |
| <b>Grade</b>                 | NS       | 1.130 (0.523, 2.441)  |
| <b>Histology*</b>            | NS       | 1.207 (0.437, 3.334)  |
| <b>Debulking</b>             | 0.060    | 0.595 (0.351, 1.007)  |
| <b>EZH2+<br/>(% in CD8+)</b> | < 0.0001 | 0.343 (0.202, 0.581)  |

\* endometrioid vs others; NS: P > 0.1

**Supplementary Table 5. Sequences of primers for PCR and ChIP assay and shRNAs**

RT-PCR primers

| <b>Name</b> | <b>Forward</b>           | <b>Reverse</b>             |
|-------------|--------------------------|----------------------------|
| Ezh2        | TGCAGTTGCTTCAGTACCCATAAT | ATCCCCGTGTACTTTCCCATCATAAT |
| GAPDH       | GAAGGTGAAGGTCGGAGT       | GAAGATGGTGATGGGATTTTC      |
| Bcl2        | TGTGGAGAGCGTCAACCGGGAG   | GCAAGCTCCCACCAGGGCCAAA     |
| Hes1        | GCAGATGACGGCTGCGCTGA     | AAGCGGGTCACCTCGTTCATGC     |
| Hey1        | TGAGAAGGCTGGTACCCAGTGCT  | TCCATAGCAAGGGCGTGCGC       |
| Hey2        | AGAGAAAAGGCGTCGGGATCGGA  | CCATGGCAAGAGCGTGTGCG       |
| Numb        | AGCGCAAGCAGAAGCGGGAG     | CGGCGTGGGATGGCATGAGG       |
| Fbxw7       | GGCGCCGCGGCTCTTTTCTA     | GCTGCCACAGAGAGCAGTTCC      |
| Bak1        | GACGCCATTCTGGAAACT       | CTTGCCCCGAAGCCATTTTT       |
| Bax1        | TGCTTCAGGGTTTCATCCAG     | GGCGGCAATCATCCTCTG         |
| Bim1        | ACTCTCGGACTGAGAAACGC     | CTTCACCTCCGTGATTGCCT       |

ChIP primers

|       |                      |                       |
|-------|----------------------|-----------------------|
| Numb  | GCGTCTGCCCCTCCTTTGCT | TACCCGCCCCGTCATCGCTCT |
| Fbxw7 | CCGGGAGAAGTGCCCTGGA  | GAAGCGGTGCTCGTGTGCGT  |

EZH2 shRNA sequences

|   |                                |
|---|--------------------------------|
| 1 | aaG AGG TTC AGA CGA GCT GAT ga |
| 2 | aaA GAC TCT GAA TGC AGT TGC tt |
